# Supplementary material for: Genome-Wide SNPs Provide Insights on the Cryptic Genetic Structure and Signatures of Climate Adaption in Amorphophallus albus Germplasms
Source: Front Plant Sci. 2021 Jul 23;12:683422. doi: 10.3389/fpls.2021.683422 (PMC8343094; doi:10.3389/fpls.2021.683422)
Supplement: Supplementary file 2 [file Data_Sheet_2.xlsx]

## Sheet: Table S1
Table S1. The 19 environmental predictors downloaded from the WorldClim website
Site ID	Bio1 (Annual Mean Temperature)	Bio2 (Mean Diurnal Range)	Bio3 (Isothermality)	Bio4 (Temperature Seasonality)	Bio5 (Max Temperature of Warmest Month)	Bio6 (Min Temperature of Coldest Month)	Bio7 (Temperature Annual Range)	Bio8 (Mean Temperature of Wettest Quarter)	Bio9 (Mean Temperature of Driest Quarter)	Bio10 (Mean Temperature of Warmest Quarter)	Bio11 (Mean Temperature of Coldest Quarter)	Bio12 (Annual Precipitation)	Bio13 (Precipitation of Wettest Month)	Bio14 (Precipitation of Driest Month)	Bio15 (Precipitation Seasonality)	Bio16 (Precipitation of Wettest Quarter)	Bio17 (Precipitation of Driest Quarter)	Bio18 (Precipitation of Warmest Quarter)	Bio19 (Precipitation of Coldest Quarter)
DGZB	15.3083	11.35	43.8224	540.857	26.5	0.6	25.9	21.2667	8.01667	21.2667	8.01667	882	192	7	95.8782	517	22	517	22
QJMZ	15.5917	11.15	42.8846	550.544	27	1	26	21.65	8.16667	21.65	8.16667	879	187	7	93.9956	508	23	508	23
YSMP	18.1292	11.1417	42.2033	565.703	29.9	3.5	26.4	24.2667	10.4333	24.2667	10.4333	841	172	7	92.3046	480	24	480	24
YSMP02	17.2458	11.0917	42.0139	563.114	29	2.6	26.4	23.4	9.61667	23.4	9.61667	852	176	7	92.4247	487	24	487	24
YPJW	16.2833	10.6333	39.6766	588.891	28.6	1.8	26.8	22.8	8.31667	22.8	8.31667	830	166	7	89.1962	464	25	464	25
YPHG	16.2833	10.6333	39.6766	588.891	28.6	1.8	26.8	22.8	8.31667	22.8	8.31667	830	166	7	89.1962	464	25	464	25
YCFZ	14.35	10.4	39.3939	581.866	26.4	0	26.4	20.8667	6.51667	20.8667	6.51667	855	171	7	88.5134	475	25	475	25
LBMH	15.3917	10	36.7647	617.2	28.3	1.1	27.2	22.2833	7.08333	22.2833	7.08333	874	173	8	86.3309	482	29	482	29
BXTC	13.725	9.15	33.8889	639.16	26.8	-0.2	27	21	5.21667	21	5.21667	894	172	10	83.5034	487	35	487	35
XLFT	14.6667	9.33333	33.6943	653.826	28.3	0.6	27.7	22.05	5.93333	22.05	5.93333	911	177	11	82.7725	494	38	494	38
JBBC	16.4167	7.91667	29.2128	686.825	30.2	3.1	27.1	24.4167	7.43333	24.4167	7.43333	1106	226	14	82.0701	597	52	597	52
BYDW	17.4333	7.53333	28.2147	690.646	31.1	4.4	26.7	25.5833	8.48333	25.5833	8.48333	1141	233	15	80.8187	611	56	611	56
YFYT	13.725	9.15	33.8889	639.16	26.8	-0.2	27	21	5.21667	21	5.21667	894	172	10	83.5034	487	35	487	35

## Sheet: Table S2
Table S2. Results of principal component analysis for 19 climate variables
Principal Component	Initial Eigenvalues				Extraction Sums of Squared Loadings
	Total	% of Variance	Cumulative %		Total	% of Variance	Cumulative %
1	11.119	58.523	58.523		11.119	58.523	58.523
2	6.122	32.222	90.745		6.122	32.222	90.745
3	1.605	8.447	99.192		1.605	8.447	99.192
4	0.128	0.673	99.865
5	0.021	0.109	99.974
6	0.004	0.018	99.993
7	0.001	0.005	99.998
8	0	0.001	99.999
9	0	0.001	100
10	1.773e-05	9.333e-05	100
11	7.611e-16	4.006e-15	100
12	2.221e-16	1.169e-15	100
13	1.921e-16	1.011e-15	100
14	1.048e-16	5.516e-16	100
15	-9.094e-21	-4.786e-20	100
16	-8.827e-17	-4.646e-16	100
17	-1.086e-16	-5.716e-16	100
18	-5.183e-16	-2.728e-15	100
19	-9.782e-16	-5.148e-15	100

## Sheet: Table S3
Table S3. General statistics for RAD-seq data of 87 Amorphophallus albus samples
Sample	Raw Reads	Raw Data (Gbp)	Clean Data (Gbp)	Q20 (%)	Q30 (%)	GC Content(%)	Coverage (×)
BXTC_1	16635750	4.991	4.79	97.4	95.75	43.17	7.88
BXTC_13	12595362	3.779	3.68	96.81	94.94	43.91	7.73
BXTC_3	24458134	7.337	7.011	97.19	95.32	43.34	9.71
BXTC_5	17527093	5.258	4.918	96.51	94.37	43.77	8.33
BXTC_6	17905927	5.372	5.191	96.59	94.52	42.98	8.56
BXTC_7	15523801	4.657	4.358	96.59	94.5	43.95	8.1
BXTC_8	22663067	6.799	6.349	96.34	94.06	44.08	9.52
BXTC_9	14945727	4.484	4.216	96.82	94.96	43.2	7.83
BYDW_1	25711656	7.713	7.488	95.84	93.6	44.31	10.85
BYDW_14	14456201	4.337	4.172	96.08	93.86	44.65	8.18
BYDW_15	25721649	7.716	7.486	96.13	93.92	43.39	10.72
BYDW_19	17141416	5.142	5.008	96.08	93.88	43.71	8.82
BYDW_2	13548799	4.065	3.88	96.31	94.22	43.62	8.02
BYDW_23	17923082	5.377	5.161	96.34	94.25	43.3	8.52
BYDW_3	20687607	6.206	6.043	95.86	93.64	43.05	9.73
BYDW_5	10289055	3.087	2.969	95.98	93.69	46.06	8.16
QJMZ_11	24219315	7.266	6.705	97.31	95.44	43.47	10.1
QJMZ_12	24177000	7.253	7.035	97.28	95.58	43.39	9.8
QJMZ_13	17391383	5.217	4.926	97.22	95.31	44.12	8.45
QJMZ_2	17311062	5.193	5.091	95.68	93.49	43.58	8.71
QJMZ_3	27544330	8.263	7.808	95.72	93.56	43.5	11.66
QJMZ_6	23064798	6.919	6.701	95.73	93.57	43.99	10.43
QJMZ_7	12697027	3.809	3.606	95.48	93.2	45.74	8.9
QJMZ_9	12083051	3.625	3.543	97.22	95.5	42.94	7.54
YCFZ_1	14726714	4.418	4.211	96.69	94.81	45.15	8.43
YCFZ_10	13581600	4.074	3.845	96.45	94.39	45.77	8.46
YCFZ_11	19937157	5.981	5.854	96.56	94.64	44.77	9.37
YCFZ_2	12412419	3.724	3.296	96.71	94.78	44.06	7.26
YCFZ_4	18558829	5.568	5.332	95.78	93.49	46.03	9.59
YCFZ_6	14961700	4.48851	4.32491	95.81	93.07	46.68	9.79
YCFZ_8	16009003	4.803	4.656	95.94	93.78	45.03	8.53
YCFZ_9	25325027	7.598	7.339	95.62	93.22	44.99	10.78
YPHG_3	13935553	4.181	3.729	96.72	94.75	43.92	7.71
YPHG_4	11831853	3.55	3.461	96.73	94.84	43.9	7.36
YPHG_6	21840245	6.552	5.618	96.77	94.88	43.12	8.75
YPJW_1	24377806	7.313	6.966	96.16	94.02	44.64	10.93
YPJW_2	15504229	4.651	4.083	96.05	93.69	42.92	8.75
YPJW_6	36660777	10.9982	10.6476	96.75	94.84	43.61	13.92
YPJW_7	18128054	5.438	4.496	96.75	94.8	43.88	8.33
YPJW_8	18422989	5.527	5.266	96.81	94.94	42.98	9.24
YSMP02_1	17485647	5.246	5.138	96.12	93.93	43.96	8.77
YSMP02_2	27934548	8.38	6.874	96.19	94.04	43.04	10.96
YSMP_1	12955767	3.887	3.815	96.44	94.46	43.2	7.6
YSMP_10	19739157	5.922	5.465	97.08	95.22	44.38	8.61
YSMP_11	20090374	6.027	5.773	97.13	95.32	43.42	8.51
YSMP_12	13168729	3.951	3.709	97.06	95.17	43.34	7.4
YSMP_6	26222220	7.867	6.822	96.5	93.77	44.37	9.43
YSMP_7	21817950	6.545	6.287	96.52	94.52	43.24	9.07
YSMP_8	16867076	5.06	4.609	96.41	94.1	44.65	7.93
YSMP_9	12738421	3.822	3.701	97.09	95.26	43.09	7.45
LBMH_15	11931265	3.579	3.416	97.28	95.53	44.17	7.36
LBMH_18	19960660	5.9882	5.76929	97.24	94.4	45.92	11.14
LBMH_2	18195978	5.459	5.232	96.59	94.66	45.41	9.72
LBMH_3	18510228	5.553	5.239	96.28	94.06	45.92	10.17
LBMH_4	14841635	4.452	4.19	96.13	93.91	46.24	9.33
LBMH_7	13210704	3.963	3.846	96.19	94.05	45.77	8.85
LBMH_8	17747267	5.324	5.068	96.28	94.14	45.34	9.27
LBMH_9	27861484	8.358	7.93	95.98	93.62	45.09	11.73
XLFT_1	23187942	6.95638	6.62662	96.8	94.04	46.24	9.96
XLFT_10	12144607	3.643	3.508	97.19	95.41	45.63	7.87
XLFT_14	20064831	6.019	5.908	97.28	95.59	43.95	8.83
XLFT_3	15635555	4.691	4.378	96.66	94.72	44.52	8.27
XLFT_6	13176283	3.953	3.731	96.78	94.94	44.36	7.83
XLFT_7	11104241	3.331	3.236	96.75	94.89	45.4	7.6
XLFT_8	12087239	3.626	3.433	96.84	95.05	44.8	7.64
XLFT_9	20185309	6.056	5.715	96.72	94.81	44.64	9.08
YFYT_1	18233317	5.47	5.281	96.4	94.35	43.45	8.64
YFYT_3	17036064	5.111	4.95	96.33	94.25	43.85	8.38
YFYT_5	15552762	4.666	4.382	97.32	95.54	44.13	7.62
YFYT_6	15431366	4.629	4.362	97.39	95.66	43.52	7.49
YFYT_7	15643139	4.693	4.449	97.4	95.7	43.19	7.59
DGZB_20	10728444	3.219	3.177	96.02	93.9	44.22	7.35
DGZB_24	20130471	6.039	5.8	95.95	93.66	45.61	9.61
DGZB_26	24644476	7.393	7.262	96.07	93.94	44.21	10.37
DGZB_27	14410059	4.323	4.158	95.83	93.4	46.23	8.64
DGZB_29	18891868	5.66756	5.46614	94.72	92.62	46.56	10.96
DGZB_30	36392408	10.918	10.014	94.91	92.46	44.45	13.67
DGZB_33	31617924	9.485	9.116	94.85	92.38	45.16	12.99
DGZB_35	13931591	4.17948	3.67211	94.66	90.92	46.64	10.22
JBBC_1	14290914	4.287	4.141	97.3	95.61	44.63	8.36
JBBC_11	21260755	6.37823	6.21718	96.52	94.16	45.13	10.61
JBBC_12	18448433	5.53453	5.31257	96.54	93.9	46.03	9.8
JBBC_13	10625373	3.188	2.993	96.43	94.44	44.42	7.77
JBBC_14	14488835	4.347	4.17	95.72	93.38	45.97	8.4
JBBC_15	15921930	4.77658	4.59912	95.72	93.29	46.93	9.6
JBBC_2	16397639	4.919	4.73	97.1	95.25	45.73	9.18
JBBC_3	30361888	9.10857	8.81393	96.5	94.05	45.14	12.24
Average	1.83419e+07	5.50253	5.21545	96.437	94.328	44.4593	9.12

## Sheet: Table S4
Table S4. Results of redundancy analysis (RDA) significance tests (the proportion of genotypic variance explained, df and P-values obtained through 999 permutations)
	% of Variance Explained	df	P-Value
Global test	33.98	5	0.001
Residual	66.02	81	-
Conditioned test
Clim_PC1	4.992	1	0.001
Clim_PC2	4.808	1	0.001
Clim_PC3	4.49	1	0.001
Longitude	5.001	1	0.001
Latitude	4.627	1	0.001

## Sheet: Table S5
Table S5. Results of outlier test and genome-environment association by BayPass
Contig ID	XtX	Clim_PC1	Clim_PC2	Clim_PC3
23710				√
81058	√	√	√
91857		√	√	√
106217	√	√	√	√
128068	√
197571		√		√
215437	√	√	√
241238	√	√		√
253646	√
280498				√
291582				√
379865	√
395974	√		√	√
447486	√			√
483158	√	√	√	√
532871	√	√	√	√
553186	√		√
575739	√	√		√
582521	√	√	√	√
590168				√
600902	√		√	√
661180			√
670402		√		√
679073	√			√
759439	√			√
876220			√
951493				√
983436	√	√	√	√
1110039	√			√
1111564		√
1508590	√	√	√	√
